# Supplementary material
Source: PubMed Central journal article supplement (PMC4711187)
Supplement: 80.1.45_zmr001162405so1.pdf [file 80.1.45_zmr001162405so1.pdf]

| GENERAL INFORMATION           |                                                                                                                                                                                                                                                                                                                    | FORMULATION |             |                                                                                                                                                         |             |           | FEATURES |           |                        |                        |            | CASE STUDIES   |                                            |                                                             | AVAILABILITY                            |                                                                                                                                                              |                |
|-------------------------------|--------------------------------------------------------------------------------------------------------------------------------------------------------------------------------------------------------------------------------------------------------------------------------------------------------------------|-------------|-------------|---------------------------------------------------------------------------------------------------------------------------------------------------------|-------------|-----------|----------|-----------|------------------------|------------------------|------------|----------------|--------------------------------------------|-------------------------------------------------------------|-----------------------------------------|--------------------------------------------------------------------------------------------------------------------------------------------------------------|----------------|
| METHOD                        | PUBLICATION URL                                                                                                                                                                                                                                                                                                    | YEAR        | FRAMEWORK   | DESCRIPTION                                                                                                                                             | SCALABILITY | TYPE      | GPRs     | DELETIONS | HETEROLOGOUS INSERTION | OVERLAPPING EXPRESSION | REGULATION | EXTRA FEATURES | ORGANISMS                                  | MODELS                                                      | APPLICATIONS                            | SOFTWARE PACKAGES                                                                                                                                            | DEPENDS        |
| OptKnock                      | <a href="http://www.ncbi.nlm.nih.gov/pubmed/14595777">http://www.ncbi.nlm.nih.gov/pubmed/14595777</a>                                                                                                                                                                                                              | 2003        | BILEVEL     | MIBLP - converted to single level MILP using duality theory                                                                                             | LOW         | Exact     | NO       | YES       | NO                     | NO                     | NO         |                | <i>E. coli</i>                             | central carbon metabolism model (Edwards and Palsson, 2000) | Succinate, Lactate and 1,3-propanediol  | Cobra toolbox, OptFlux                                                                                                                                       | Matlab (Cobra) |
| OptStrain                     | <a href="http://www.ncbi.nlm.nih.gov/pubmed/15520298">http://www.ncbi.nlm.nih.gov/pubmed/15520298</a>                                                                                                                                                                                                              | 2004        | BILEVEL     | MIBLP - converted to single level MILP using duality theory                                                                                             | LOW         | Exact     | NO       | YES       | YES                    | NO                     | NO         |                | <i>E. coli</i><br><i>C. acetobutylicum</i> | iJR904 and (Papoutsakis 1984; Desai et al, 1999)            | Hydrogen and vanillin                   |                                                                                                                                                              |                |
| OptGene                       | <a href="http://www.ncbi.nlm.nih.gov/pubmed/16375763">http://www.ncbi.nlm.nih.gov/pubmed/16375763</a>                                                                                                                                                                                                              | 2005        | BILEVEL     | Bi-level Heuristic. GA generates genotypes whose phenotypes are predicted by LP (FBA)                                                                   | HIGH        | Heuristic | NO       | YES       | NO                     | NO                     | NO         |                | <i>S. cerevisiae</i>                       | IFF708                                                      | Vanillin, Glycerol and Succinate        | OptFlux, Cobra toolbox                                                                                                                                       | Matlab (Cobra) |
| OptReg                        | <a href="http://www.ncbi.nlm.nih.gov/pubmed/16199194">http://www.ncbi.nlm.nih.gov/pubmed/16199194</a>                                                                                                                                                                                                              | 2006        | BILEVEL     | MIBLP - converted to single level MILP using duality theory                                                                                             | LOW         | Exact     | NO       | YES       | NO                     | YES                    | NO         |                | <i>E. coli</i>                             | iJR904                                                      | Ethanol                                 |                                                                                                                                                              |                |
| MMF                           | <a href="http://www.sciencedirect.com/science/article/pii/S10967176060067X">http://www.sciencedirect.com/science/article/pii/S10967176060067X</a>                                                                                                                                                                  | 2006        | EMA         | EFMs                                                                                                                                                    | LOW         | Exact     | NO       | NO        | NO                     | NO                     | NO         |                | <i>E. coli</i>                             | core of intermediary metabolism (Carlson and Srienc, 2004)  | Biomass                                 |                                                                                                                                                              |                |
| EAs/SAs                       | <a href="http://www.ncbi.nlm.nih.gov/pubmed/19038030">http://www.ncbi.nlm.nih.gov/pubmed/19038030</a>                                                                                                                                                                                                              | 2008        | BILEVEL     | Bi-level Heuristic. EA/SA generate genotypes whose phenotypes are predicted by LP (FBA)                                                                 | HIGH        | Heuristic | YES      | YES       | NO                     | NO                     | NO         |                | <i>E. coli</i><br><i>S. cerevisiae</i>     | iJR904<br>IND750                                            | Succinate and Lactate                   | OptFlux                                                                                                                                                      |                |
| GDLS                          | <a href="http://www.ncbi.nlm.nih.gov/pubmed/19690565">http://www.ncbi.nlm.nih.gov/pubmed/19690565</a>                                                                                                                                                                                                              | 2009        | BILEVEL     | MIBLP - converted to single level MILP using duality theory                                                                                             | MEDIUM      | Heuristic | YES      | YES       | NO                     | NO                     | NO         |                | <i>E. coli</i>                             | iAF1260                                                     | Acetate and Succinate                   | Cobra toolbox; author's homepage: <a href="http://crab.rutgers.edu/~dslu/n/gdls/">http://crab.rutgers.edu/~dslu/n/gdls/</a>                                  | Matlab         |
| CIED                          | <a href="http://www.ncbi.nlm.nih.gov/pubmed/19633125">http://www.ncbi.nlm.nih.gov/pubmed/19633125</a>                                                                                                                                                                                                              | 2009        | BILEVEL     | Bi-level Heuristic. Evolutionary cipher                                                                                                                 | HIGH        | Heuristic | YES      | YES       | NO                     | NO                     | NO         |                | <i>E. coli</i>                             | iJR904                                                      | Flavones                                |                                                                                                                                                              |                |
| FluxDesign                    | <a href="http://www.ncbi.nlm.nih.gov/pubmed/20035624">http://www.ncbi.nlm.nih.gov/pubmed/20035624</a>                                                                                                                                                                                                              | 2009        | EMA         | EFMs                                                                                                                                                    | LOW         | Exact     | NO       | YES       | NO                     | YES                    | NO         |                | <i>C. glutamicum</i><br><i>A. niger</i>    | (simplified models)                                         | Lysine and Enzymes                      |                                                                                                                                                              |                |
| RobustKnock                   | <a href="http://www.ncbi.nlm.nih.gov/pubmed/20031969">http://www.ncbi.nlm.nih.gov/pubmed/20031969</a>                                                                                                                                                                                                              | 2010        | Multi-LEVEL | Max-min MIBLP - converted to single level MILP using duality theory                                                                                     | LOW         | Exact     | NO       | YES       | NO                     | NO                     | NO         |                | <i>E. coli</i>                             | iJR904                                                      | Hydrogen, Acetate, Formate and Fumarate | Author's homepage: <a href="http://www.cs.technion.ac.il/~tomersh/methods.html">http://www.cs.technion.ac.il/~tomersh/methods.html</a>                       |                |
| OptORF                        | <a href="http://www.biomedcentral.com/1752-0509/4/53/">http://www.biomedcentral.com/1752-0509/4/53/</a>                                                                                                                                                                                                            | 2010        | BILEVEL     | MIBLP - converted to single level MILP using duality theory                                                                                             | LOW         | Exact     | YES      | YES       | NO                     | YES                    | YES        |                | <i>E. coli</i>                             | IMC1010 (v2)                                                | Ethanol, isobutanol and 2-phenylethanol |                                                                                                                                                              |                |
| OptForce                      | <a href="http://www.ncbi.nlm.nih.gov/pubmed/20419153">http://www.ncbi.nlm.nih.gov/pubmed/20419153</a>                                                                                                                                                                                                              | 2010        |             | LP                                                                                                                                                      | LOW         | Exact     | NO       | NO        | NO                     | YES                    | NO         |                | <i>E. coli</i>                             | iAF1260                                                     | Succinate                               | Available in the author's homepage upon request: <a href="http://maranas.che.psu.edu/submit/optforce.htm">http://maranas.che.psu.edu/submit/optforce.htm</a> |                |
| CASOP                         | <a href="http://www.ncbi.nlm.nih.gov/pubmed/20303369">http://www.ncbi.nlm.nih.gov/pubmed/20303369</a><br><a href="http://subs.emis.de/LNI/Proceedings/Proceedings173/P_173.pdf?orjin=publication_detail#page=22">http://subs.emis.de/LNI/Proceedings/Proceedings173/P_173.pdf?orjin=publication_detail#page=22</a> | 2010        | EMA         | EFMs                                                                                                                                                    | LOW         | Heuristic | NO       | YES       | NO                     | YES                    | NO         |                | <i>E. coli</i>                             | central carbon metabolism model                             | Succinate                               | CellNetAnalyzer                                                                                                                                              | Matlab         |
| CASOP-GS                      | <a href="http://www.ncbi.nlm.nih.gov/pubmed/21147248">http://www.ncbi.nlm.nih.gov/pubmed/21147248</a>                                                                                                                                                                                                              | 2010        | EMA         | EFMs                                                                                                                                                    | HIGH        | Heuristic | NO       | YES       | NO                     | YES                    | NO         |                | <i>E. coli</i>                             | iAF1260                                                     | Succinate and histidine                 | Available on request (including source)                                                                                                                      |                |
| cMCS                          | <a href="http://www.ncbi.nlm.nih.gov/pubmed/21147248">http://www.ncbi.nlm.nih.gov/pubmed/21147248</a>                                                                                                                                                                                                              | 2011        | EMA         | EFMs                                                                                                                                                    | LOW         | Exact     | NO       | YES       | NO                     | NO                     | NO         |                | <i>E. coli</i>                             | (Trinh et al., 2008)                                        | Ethanol                                 | CellNetAnalyzer                                                                                                                                              | Matlab         |
| BIMOMA                        | <a href="http://www.ncbi.nlm.nih.gov/pubmed/21949695">http://www.ncbi.nlm.nih.gov/pubmed/21949695</a>                                                                                                                                                                                                              | 2011        | BILEVEL     | MIQCP                                                                                                                                                   | MEDIUM      | Exact     | NO       | YES       | NO                     | NO                     | NO         |                | <i>E. coli</i>                             | iJR904                                                      | Glutamate and pyruvate                  |                                                                                                                                                              |                |
| SimOptStrain                  | <a href="http://www.ncbi.nlm.nih.gov/pubmed/21949695">http://www.ncbi.nlm.nih.gov/pubmed/21949695</a>                                                                                                                                                                                                              | 2011        | BILEVEL     | MILP                                                                                                                                                    | LOW         | Exact     | YES      | YES       | YES                    | NO                     | NO         |                | <i>E. coli</i>                             | iJR904                                                      | Succinate and glycerol                  |                                                                                                                                                              |                |
| EMILIO                        | <a href="http://www.ncbi.nlm.nih.gov/pubmed/21414417">http://www.ncbi.nlm.nih.gov/pubmed/21414417</a>                                                                                                                                                                                                              | 2011        |             | Iterative LP (ILP)                                                                                                                                      | HIGH        | Exact     | NO       | YES       | NO                     | YES                    | NO         |                | <i>E. coli</i>                             | iAF1260                                                     | Succinate, glutamate and L-serine       |                                                                                                                                                              |                |
| EAs/SAs Regulation            | <a href="http://www.ncbi.nlm.nih.gov/pubmed/21144882">http://www.ncbi.nlm.nih.gov/pubmed/21144882</a>                                                                                                                                                                                                              | 2011        | BILEVEL     | (EA/SA) FBA/SR-FBA                                                                                                                                      | HIGH        | Heuristic | YES      | YES       | NO                     | NO                     | YES        |                | <i>E. coli</i>                             | iAF1260                                                     | Ethanol                                 | OptFlux plugin                                                                                                                                               |                |
| GDMO                          | <a href="http://www.ncbi.nlm.nih.gov/pubmed/23044547">http://www.ncbi.nlm.nih.gov/pubmed/23044547</a>                                                                                                                                                                                                              | 2012        | BILEVEL     | NSGA-II based search, FBA evaluation                                                                                                                    | HIGH        | Heuristic | YES      | YES       | NO                     | NO                     | NO         |                | <i>E. coli</i>                             | iAF1260                                                     | Succinate and acetate                   |                                                                                                                                                              |                |
| GDBB                          | <a href="http://www.ncbi.nlm.nih.gov/pubmed/22543499">http://www.ncbi.nlm.nih.gov/pubmed/22543499</a>                                                                                                                                                                                                              | 2012        | BILEVEL     | MIBLP converted to MILP based implementation. TBB, prevents the branch and bound algorithm from reaching optimal solution and stops at near-optimality. | HIGH        | Heuristic | YES      | YES       | NO                     | YES                    | NO         |                | <i>E. coli</i>                             | iAF1260                                                     | Succinate and acetate                   | Author's homepage: <a href="http://crab.rutgers.edu/~dslu/n/gddb">http://crab.rutgers.edu/~dslu/n/gddb</a>                                                   | Matlab         |
| EAs/SAs Over-under expression | <a href="http://online.liebertpub.com/dp/abs/10.1089/cmb.2011.0265">http://online.liebertpub.com/dp/abs/10.1089/cmb.2011.0265</a>                                                                                                                                                                                  | 2012        | BILEVEL     | (EA/SA) FBA/MOMA/ROOM                                                                                                                                   | HIGH        | Heuristic | YES      | YES       | NO                     | YES                    | NO         |                | <i>E. coli</i>                             | iJR904                                                      | Succinate and Lactate                   | OptFlux                                                                                                                                                      |                |

|                |                                                                                                                                                                                          |      |                                      |                                                                                                                                                              |        |           |     |     |    |     |     |                                        |                                                                           |                                               |                                                                                                                                                   |
|----------------|------------------------------------------------------------------------------------------------------------------------------------------------------------------------------------------|------|--------------------------------------|--------------------------------------------------------------------------------------------------------------------------------------------------------------|--------|-----------|-----|-----|----|-----|-----|----------------------------------------|---------------------------------------------------------------------------|-----------------------------------------------|---------------------------------------------------------------------------------------------------------------------------------------------------|
| rcMCS          | <a href="http://www.biomedcentral.com/1752-0509/6/103/abstract">http://www.biomedcentral.com/1752-0509/6/103/abstract</a>                                                                | 2012 | EMA                                  | BLP(Binary Linear Programming)                                                                                                                               | LOW    | Exact     | YES | YES | NO | NO  | YES | <i>E. coli</i>                         | (Trinh et al., 2008)                                                      | Ethanol                                       |                                                                                                                                                   |
| MOMAknock      | <a href="http://www.ncbi.nlm.nih.gov/pubmed/23368729">http://www.ncbi.nlm.nih.gov/pubmed/23368729</a>                                                                                    | 2013 | BILEVEL                              | MIBQP - converted to single level MILP using duality theory                                                                                                  | LOW    | Exact     | YES | YES | NO | NO  | NO  | <i>E. coli</i>                         | IAF1260                                                                   | Succinate                                     |                                                                                                                                                   |
| Redirector     | <a href="http://www.ncbi.nlm.nih.gov/pubmed/23341769">http://www.ncbi.nlm.nih.gov/pubmed/23341769</a>                                                                                    | 2013 | BILEVEL                              | MIBLP - converted to single level MILP using duality theory                                                                                                  | MEDIUM | Heuristic | YES | NO  | NO | YES | NO  | <i>E. coli</i>                         | IAF1260                                                                   | myristoyl-CoA                                 | Available from author's site: <a href="https://github.com/bionomicron/Redirector.git">https://github.com/bionomicron/Redirector.git</a>           |
| OptSwap        | <a href="http://online.liebertpub.com/doi/abs/10.1089/ind.2013.0005">http://online.liebertpub.com/doi/abs/10.1089/ind.2013.0005</a>                                                      | 2013 | MULTI-LEVEL (similar to RobustKnock) | Max-min MIBLP - converted to single level MILP using duality theory                                                                                          | LOW    | Exact     | NO  | YES | NO | NO  | NO  | <i>E. coli</i>                         | IO1366                                                                    | production of a wide spectrum of products     | Swapping of the cofactor specificity for oxyreductase enzymes                                                                                     |
| ReacKnock      | <a href="http://www.ncbi.nlm.nih.gov/pubmed/24348984/">http://www.ncbi.nlm.nih.gov/pubmed/24348984/</a>                                                                                  | 2013 | BILEVEL                              | MIBLP - converted to single level MILP using Karush-Kuhn-Tucker for continuous inner problems.                                                               | LOW    | Exact     | NO  | YES | NO | NO  | NO  | <i>E. coli</i>                         | IAF1260                                                                   | Succinate, ethanol and threonine              |                                                                                                                                                   |
| SMET           | <a href="http://online.liebertpub.com/doi/10.1002/biot.201200233/abstract">http://online.liebertpub.com/doi/10.1002/biot.201200233/abstract</a>                                          | 2013 | EMA                                  | cMCS                                                                                                                                                         | LOW    | Exact     | NO  | YES | NO | YES | NO  | <i>E. coli</i>                         | (Rizk and Liao, 2009)                                                     | DAHP                                          |                                                                                                                                                   |
| FastPros       | <a href="http://www.ncbi.nlm.nih.gov/pubmed/24257186">http://www.ncbi.nlm.nih.gov/pubmed/24257186</a>                                                                                    | 2013 | Multi-Step                           | Exhaustive computation of dual mutants, LP for calculation of u-targets followed by iterative single mutant addition for best. Screening via OptKnock (MILP) | HIGH   | Heuristic | NO  | YES | NO | NO  | NO  | <i>E. coli</i>                         | IAF1260                                                                   | production of every cytosolic metabolite      | <a href="http://www.shimizu-ist.osaka-u.ac.jp/shimizu_lab/FastPros/">http://www.shimizu-ist.osaka-u.ac.jp/shimizu_lab/FastPros/</a> MatLab, COBRA |
| CosMos         | <a href="http://online.liebertpub.com/doi/10.1002/biot.201200316/full">http://online.liebertpub.com/doi/10.1002/biot.201200316/full</a>                                                  | 2013 | BILEVEL                              | MILP                                                                                                                                                         | LOW    | Exact     | YES | YES | NO | YES | NO  | <i>E. coli</i><br><i>S. cerevisiae</i> | IO1366<br>IMM904                                                          | Chorismate, ethanol, succinate, L-amino acids |                                                                                                                                                   |
| MCS Enumerator | <a href="http://www.ploscompbiol.org/article/info%3Adoi%2F10.1371%2Fjournal.pcbi.1003378">http://www.ploscompbiol.org/article/info%3Adoi%2F10.1371%2Fjournal.pcbi.1003378</a>            | 2014 | EMA                                  | MILP                                                                                                                                                         | HIGH   | Exact     | NO  | YES | NO | NO  | NO  | <i>E. coli</i>                         | IAF1260                                                                   | Fumarate and serine                           | CellNetAnalyzer Matlab                                                                                                                            |
| k-OptForce     | <a href="http://www.ploscompbiol.org/article/info%3Adoi%2F10.1371%2Fjournal.pcbi.1003487">http://www.ploscompbiol.org/article/info%3Adoi%2F10.1371%2Fjournal.pcbi.1003487</a><br>Curran1 | 2014 | BILEVEL                              | MILP                                                                                                                                                         | LOW    | Exact     | NO  | YES | NO | YES | NO  | <i>E. coli</i><br><i>S. cerevisiae</i> | IAF1260 + (Chassagnole et al., 2002)<br>IAZ900 + (van Eunen et al., 2012) | L-serine and TAL                              | Hybrid stoichiometric and kinetic                                                                                                                 |
